# Supplementary material for: Machine learning-based diagnostic model of lymphatics-associated genes for new therapeutic target analysis in intervertebral disc degeneration
Source: Front Immunol. 2024 Dec 4;15:1441028. doi: 10.3389/fimmu.2024.1441028 (PMC11652530; doi:10.3389/fimmu.2024.1441028)
Supplement: Supplementary file 1 [file Table1.xlsx]

## Sheet: Sheet1
ONTOLOGY	ID	Description	GeneRatio	BgRatio	pvalue	p.adjust	qvalue	geneID	Count
BP	GO:0061138	morphogenesis of a branching epithelium	45611	187/18870	8.87252e-20	1.01235e-16	4.21211e-17	SPRY2/CSF1/MET/AR/SPRY1/MDK/PDGFA/EPHA2/HHIP/LHX1/TACSTD2	11
BP	GO:0001763	morphogenesis of a branching structure	45611	203/18870	2.23526e-19	1.27521e-16	5.3058e-17	SPRY2/CSF1/MET/AR/SPRY1/MDK/PDGFA/EPHA2/HHIP/LHX1/TACSTD2	11
BP	GO:0048754	branching morphogenesis of an epithelial tube	45580	156/18870	3.22762e-18	1.22757e-15	5.10757e-16	SPRY2/CSF1/MET/AR/SPRY1/MDK/EPHA2/HHIP/LHX1/TACSTD2	10
BP	GO:0060562	epithelial tube morphogenesis	45580	334/18870	7.32971e-15	2.0908e-12	8.69921e-13	SPRY2/CSF1/MET/AR/SPRY1/MDK/EPHA2/HHIP/LHX1/TACSTD2	10
BP	GO:2000027	regulation of animal organ morphogenesis	45458	126/18870	3.74547e-10	7.29484e-08	3.03517e-08	CSF1/AR/SPRY1/PDGFA/LHX1/TACSTD2	6
BP	GO:0060688	regulation of morphogenesis of a branching structure	45427	52/18870	3.83602e-10	7.29484e-08	3.03517e-08	AR/MDK/PDGFA/LHX1/TACSTD2	5
BP	GO:1905330	regulation of morphogenesis of an epithelium	45427	65/18870	1.21215e-09	1.97581e-07	8.22076e-08	AR/MDK/PDGFA/LHX1/TACSTD2	5
BP	GO:0022612	gland morphogenesis	45427	122/18870	2.96612e-08	4.23042e-06	1.76016e-06	CSF1/AR/MDK/PDGFA/EPHA2	5
BP	GO:0060444	branching involved in mammary gland duct morphogenesis	45366	21/18870	5.35843e-07	6.7933e-05	2.82649e-05	CSF1/AR/EPHA2	3
BP	GO:0048732	gland development	45458	443/18870	6.76864e-07	7.72302e-05	3.21332e-05	CSF1/MET/AR/MDK/PDGFA/EPHA2	6
BP	GO:0006935	chemotaxis	45458	468/18870	9.32887e-07	9.09376e-05	3.78365e-05	CSF1/MET/MAPK14/MDK/PDGFA/EPHA2	6
BP	GO:0042330	taxis	45458	470/18870	9.56399e-07	9.09376e-05	3.78365e-05	CSF1/MET/MAPK14/MDK/PDGFA/EPHA2	6
BP	GO:0060603	mammary gland duct morphogenesis	45366	29/18870	1.46655e-06	0.000128718	5.35557e-05	CSF1/AR/EPHA2	3
BP	GO:0060441	epithelial tube branching involved in lung morphogenesis	45366	30/18870	1.62872e-06	0.000129049	5.36936e-05	SPRY2/SPRY1/HHIP	3
BP	GO:0044344	cellular response to fibroblast growth factor stimulus	45397	115/18870	1.69653e-06	0.000129049	5.36936e-05	SPRY2/SPRY1/HHIP/LHX1	4
BP	GO:0071774	response to fibroblast growth factor	45397	123/18870	2.21956e-06	0.000158283	6.58568e-05	SPRY2/SPRY1/HHIP/LHX1	4
BP	GO:0110110	positive regulation of animal organ morphogenesis	45366	35/18870	2.61935e-06	0.000175805	7.31472e-05	CSF1/AR/SPRY1	3
BP	GO:1905332	positive regulation of morphogenesis of an epithelium	45366	36/18870	2.85611e-06	0.000181046	7.53278e-05	AR/MDK/LHX1	3
BP	GO:0070306	lens fiber cell differentiation	45366	37/18870	3.10664e-06	0.000186562	7.76229e-05	SPRY2/SPRY1/EPHA2	3
BP	GO:0040036	regulation of fibroblast growth factor receptor signaling pathway	45366	38/18870	3.37131e-06	0.000192333	8.00242e-05	SPRY2/SPRY1/HHIP	3
BP	GO:0060443	mammary gland morphogenesis	45366	43/18870	4.92012e-06	0.000267327	0.000111227	CSF1/AR/EPHA2	3
BP	GO:0046580	negative regulation of Ras protein signal transduction	45366	48/18870	6.87915e-06	0.000356778	0.000148445	SPRY2/MET/SPRY1	3
BP	GO:0061351	neural precursor cell proliferation	45397	166/18870	7.30999e-06	0.000362639	0.000150884	TOX/MDK/HHIP/LHX1	4
BP	GO:0060425	lung morphogenesis	45366	54/18870	9.83709e-06	0.000467672	0.000194585	SPRY2/SPRY1/HHIP	3
BP	GO:0051058	negative regulation of small GTPase mediated signal transduction	45366	55/18870	1.03997e-05	0.00047165	0.00019624	SPRY2/MET/SPRY1	3
BP	GO:0046578	regulation of Ras protein signal transduction	45397	183/18870	1.07475e-05	0.00047165	0.00019624	SPRY2/CSF1/MET/SPRY1	4
BP	GO:0030324	lung development	45397	188/18870	1.19537e-05	0.000505153	0.000210179	SPRY2/SPRY1/PDGFA/HHIP	4
BP	GO:0030323	respiratory tube development	45397	192/18870	1.29883e-05	0.000529273	0.000220215	SPRY2/SPRY1/PDGFA/HHIP	4
BP	GO:2000179	positive regulation of neural precursor cell proliferation	45366	63/18870	1.56816e-05	0.000616989	0.000256711	TOX/MDK/LHX1	3
BP	GO:0061180	mammary gland epithelium development	45366	66/18870	1.80444e-05	0.00068629	0.000285545	CSF1/AR/EPHA2	3
BP	GO:0060541	respiratory system development	45397	214/18870	1.99037e-05	0.000732586	0.000304808	SPRY2/SPRY1/PDGFA/HHIP	4
BP	GO:0051386	regulation of neurotrophin TRK receptor signaling pathway	45337	11/18870	3.23047e-05	0.00115083	0.000478827	SPRY2/SPRY1	2
BP	GO:0060560	developmental growth involved in morphogenesis	45397	244/18870	3.32843e-05	0.00115083	0.000478827	SPRY2/CSF1/SPRY1/LHX1	4
BP	GO:0008543	fibroblast growth factor receptor signaling pathway	45366	86/18870	3.99719e-05	0.00134141	0.000558122	SPRY2/SPRY1/HHIP	3
BP	GO:0002088	lens development in camera-type eye	45366	89/18870	4.42923e-05	0.00144393	0.000600777	SPRY2/SPRY1/EPHA2	3
BP	GO:0001656	metanephros development	45366	94/18870	5.21552e-05	0.00165303	0.000687778	SPRY1/PDGFA/LHX1	3
BP	GO:0001657	ureteric bud development	45366	98/18870	5.90661e-05	0.00178121	0.000741111	SPRY1/LHX1/TACSTD2	3
BP	GO:0072163	mesonephric epithelium development	45366	99/18870	6.08829e-05	0.00178121	0.000741111	SPRY1/LHX1/TACSTD2	3
BP	GO:0072164	mesonephric tubule development	45366	99/18870	6.08829e-05	0.00178121	0.000741111	SPRY1/LHX1/TACSTD2	3
BP	GO:2000177	regulation of neural precursor cell proliferation	45366	100/18870	6.27359e-05	0.00178954	0.000744576	TOX/MDK/LHX1	3
BP	GO:0001823	mesonephros development	45366	103/18870	6.85159e-05	0.00189438	0.000788195	SPRY1/LHX1/TACSTD2	3
BP	GO:0051056	regulation of small GTPase mediated signal transduction	45397	295/18870	6.97317e-05	0.00189438	0.000788195	SPRY2/CSF1/MET/SPRY1	4
BP	GO:0030316	osteoclast differentiation	45366	106/18870	7.46343e-05	0.00198041	0.000823992	CSF1/MAPK14/EPHA2	3
BP	GO:0010717	regulation of epithelial to mesenchymal transition	45366	111/18870	8.56081e-05	0.00220318	0.000916678	SPRY2/SPRY1/MDK	3
BP	GO:0070372	regulation of ERK1 and ERK2 cascade	45397	313/18870	8.77319e-05	0.00220318	0.000916678	SPRY2/SPRY1/PDGFA/EPHA2	4
BP	GO:0001822	kidney development	45397	314/18870	8.88222e-05	0.00220318	0.000916678	SPRY1/PDGFA/LHX1/TACSTD2	4
BP	GO:0010759	positive regulation of macrophage chemotaxis	45337	19/18870	0.00010007	0.00231574	0.00096351	CSF1/MDK	2
BP	GO:0060602	branch elongation of an epithelium	45337	19/18870	0.00010007	0.00231574	0.00096351	SPRY2/SPRY1	2
BP	GO:0072001	renal system development	45397	324/18870	0.000100277	0.00231574	0.00096351	SPRY1/PDGFA/LHX1/TACSTD2	4
BP	GO:0060326	cell chemotaxis	45397	325/18870	0.000101478	0.00231574	0.00096351	CSF1/MET/MDK/EPHA2	4
BP	GO:0030278	regulation of ossification	45366	121/18870	0.000110614	0.00247473	0.00102966	CSF1/MAPK14/MDK	3
BP	GO:0070371	ERK1 and ERK2 cascade	45397	336/18870	0.000115402	0.00251308	0.00104562	SPRY2/SPRY1/PDGFA/EPHA2	4
BP	GO:0033674	positive regulation of kinase activity	45397	337/18870	0.000116734	0.00251308	0.00104562	CSF1/MET/PDGFA/EPHA2	4
BP	GO:0007265	Ras protein signal transduction	45397	341/18870	0.000122171	0.00254713	0.00105978	SPRY2/CSF1/MET/SPRY1	4
BP	GO:0090189	regulation of branching involved in ureteric bud morphogenesis	45337	21/18870	0.00012278	0.00254713	0.00105978	LHX1/TACSTD2	2
BP	GO:0043010	camera-type eye development	45397	344/18870	0.000126369	0.00257476	0.00107128	SPRY2/SPRY1/EPHA2/LHX1	4
BP	GO:0030879	mammary gland development	45366	133/18870	0.000146388	0.00290728	0.00120964	CSF1/AR/EPHA2	3
BP	GO:0001759	organ induction	45337	23/18870	0.000147785	0.00290728	0.00120964	AR/SPRY1	2
BP	GO:0040037	negative regulation of fibroblast growth factor receptor signaling pathway	45337	24/18870	0.000161146	0.00311639	0.00129664	SPRY2/SPRY1	2
BP	GO:0048011	neurotrophin TRK receptor signaling pathway	45337	25/18870	0.000175078	0.00332301	0.00138261	SPRY2/SPRY1	2
BP	GO:0043405	regulation of MAP kinase activity	45366	142/18870	0.000177655	0.00332301	0.00138261	SPRY2/SPRY1/PDGFA	3
BP	GO:0050921	positive regulation of chemotaxis	45366	145/18870	0.000188967	0.00343352	0.00142859	CSF1/MET/MDK	3
BP	GO:1905523	positive regulation of macrophage migration	45337	26/18870	0.000189581	0.00343352	0.00142859	CSF1/MDK	2
BP	GO:0001654	eye development	45397	391/18870	0.000206738	0.003666	0.00152532	SPRY2/SPRY1/EPHA2/LHX1	4
BP	GO:0072073	kidney epithelium development	45366	150/18870	0.000208843	0.003666	0.00152532	SPRY1/LHX1/TACSTD2	3
BP	GO:0150063	visual system development	45397	395/18870	0.000214957	0.00369641	0.00153797	SPRY2/SPRY1/EPHA2/LHX1	4
BP	GO:0003156	regulation of animal organ formation	45337	28/18870	0.000220295	0.00369641	0.00153797	AR/SPRY1	2
BP	GO:0010758	regulation of macrophage chemotaxis	45337	28/18870	0.000220295	0.00369641	0.00153797	CSF1/MDK	2
BP	GO:0048880	sensory system development	45397	401/18870	0.000227726	0.00376574	0.00156681	SPRY2/SPRY1/EPHA2/LHX1	4
BP	GO:0003401	axis elongation	45337	29/18870	0.000236504	0.00385501	0.00160396	SPRY2/SPRY1	2
BP	GO:0051347	positive regulation of transferase activity	45397	414/18870	0.000257266	0.00413438	0.00172019	CSF1/MET/PDGFA/EPHA2	4
BP	GO:1903706	regulation of hemopoiesis	45397	417/18870	0.000264458	0.00419093	0.00174372	TOX/CSF1/MAPK14/MDK	4
BP	GO:0003002	regionalization	45397	430/18870	0.000297314	0.00461027	0.0019182	AR/SPRY1/HHIP/LHX1	4
BP	GO:0003382	epithelial cell morphogenesis	45337	33/18870	0.000307007	0.00461027	0.0019182	MET/AR	2
BP	GO:0051497	negative regulation of stress fiber assembly	45337	33/18870	0.000307007	0.00461027	0.0019182	MET/TACSTD2	2
BP	GO:0030856	regulation of epithelial cell differentiation	45366	171/18870	0.000307082	0.00461027	0.0019182	SPRY2/SPRY1/LHX1	3
BP	GO:0031128	developmental induction	45337	34/18870	0.000326045	0.00476946	0.00198443	AR/SPRY1	2
BP	GO:0090183	regulation of kidney development	45337	34/18870	0.000326045	0.00476946	0.00198443	LHX1/TACSTD2	2
BP	GO:0001503	ossification	45397	444/18870	0.000335892	0.00480955	0.00200111	CSF1/MAPK14/MDK/EPHA2	4
BP	GO:0035265	organ growth	45366	177/18870	0.000339782	0.00480955	0.00200111	SPRY2/AR/MAPK14	3
BP	GO:0001837	epithelial to mesenchymal transition	45366	178/18870	0.000345442	0.00480955	0.00200111	SPRY2/SPRY1/MDK	3
BP	GO:0000132	establishment of mitotic spindle orientation	45337	35/18870	0.000345647	0.00480955	0.00200111	SPRY2/SPRY1	2
BP	GO:0048568	embryonic organ development	45397	453/18870	0.000362522	0.00491048	0.00204311	SPRY2/PDGFA/EPHA2/LHX1	4
BP	GO:0010092	specification of animal organ identity	45337	36/18870	0.000365811	0.00491048	0.00204311	AR/SPRY1	2
BP	GO:0032232	negative regulation of actin filament bundle assembly	45337	36/18870	0.000365811	0.00491048	0.00204311	MET/TACSTD2	2
BP	GO:1902107	positive regulation of leukocyte differentiation	45366	185/18870	0.000386774	0.00507251	0.00211053	TOX/CSF1/MDK	3
BP	GO:1903708	positive regulation of hemopoiesis	45366	185/18870	0.000386774	0.00507251	0.00211053	TOX/CSF1/MDK	3
BP	GO:0038179	neurotrophin signaling pathway	45337	39/18870	0.000429671	0.00556382	0.00231494	SPRY2/SPRY1	2
BP	GO:0007389	pattern specification process	45397	475/18870	0.000433987	0.00556382	0.00231494	AR/SPRY1/HHIP/LHX1	4
BP	GO:0050673	epithelial cell proliferation	45397	480/18870	0.000451544	0.00566836	0.00235844	AR/MDK/EPHA2/TACSTD2	4
BP	GO:0040001	establishment of mitotic spindle localization	45337	40/18870	0.000452078	0.00566836	0.00235844	SPRY2/SPRY1	2
BP	GO:0045066	regulatory T cell differentiation	45337	41/18870	0.000475043	0.00582822	0.00242495	TOX/MDK	2
BP	GO:0048246	macrophage chemotaxis	45337	41/18870	0.000475043	0.00582822	0.00242495	CSF1/MDK	2
BP	GO:0007264	small GTPase mediated signal transduction	45397	491/18870	0.000491959	0.00597154	0.00248459	SPRY2/CSF1/MET/SPRY1	4
BP	GO:0051294	establishment of spindle orientation	45337	42/18870	0.000498567	0.00598805	0.00249145	SPRY2/SPRY1	2
BP	GO:0010719	negative regulation of epithelial to mesenchymal transition	45337	43/18870	0.000522647	0.00614784	0.00255794	SPRY2/SPRY1	2
BP	GO:0032735	positive regulation of interleukin-12 production	45337	43/18870	0.000522647	0.00614784	0.00255794	MAPK14/MDK	2
BP	GO:1905521	regulation of macrophage migration	45337	45/18870	0.000572476	0.00666525	0.00277322	CSF1/MDK	2
BP	GO:0002064	epithelial cell development	45366	214/18870	0.000591731	0.00681985	0.00283754	MET/AR/EPHA2	3
BP	GO:0048806	genitalia development	45337	47/18870	0.000624524	0.00712581	0.00296484	AR/LHX1	2
BP	GO:0010810	regulation of cell-substrate adhesion	45366	220/18870	0.000641317	0.00724497	0.00301442	CSF1/MDK/TACSTD2	3
BP	GO:0048705	skeletal system morphogenesis	45366	230/18870	0.000729744	0.00806656	0.00335626	MAPK14/HHIP/LHX1	3
BP	GO:0021695	cerebellar cortex development	45337	51/18870	0.000735251	0.00806656	0.00335626	MDK/LHX1	2
BP	GO:0043407	negative regulation of MAP kinase activity	45337	51/18870	0.000735251	0.00806656	0.00335626	SPRY2/SPRY1	2
BP	GO:0050920	regulation of chemotaxis	45366	232/18870	0.000748316	0.0081317	0.00338336	CSF1/MET/MDK	3
BP	GO:0002573	myeloid leukocyte differentiation	45366	235/18870	0.000776737	0.00836091	0.00347873	CSF1/MAPK14/EPHA2	3
BP	GO:0071622	regulation of granulocyte chemotaxis	45337	53/18870	0.000793919	0.008466	0.00352245	CSF1/MDK	2
BP	GO:0030857	negative regulation of epithelial cell differentiation	45337	56/18870	0.000886033	0.00936077	0.00389474	SPRY2/SPRY1	2
BP	GO:0051896	regulation of phosphatidylinositol 3-kinase/protein kinase B signal transduction	45366	248/18870	0.000907858	0.00950335	0.00395407	SPRY2/PDGFA/EPHA2	3
BP	GO:0051293	establishment of spindle localization	45337	57/18870	0.000917831	0.00952041	0.00396116	SPRY2/SPRY1	2
BP	GO:0031663	lipopolysaccharide-mediated signaling pathway	45337	58/18870	0.000950174	0.0097671	0.00406381	CD55/MAPK14	2
BP	GO:0001658	branching involved in ureteric bud morphogenesis	45337	60/18870	0.00101649	0.0103555	0.00430864	LHX1/TACSTD2	2
BP	GO:1900024	regulation of substrate adhesion-dependent cell spreading	45337	61/18870	0.00105047	0.0105139	0.00437453	MDK/TACSTD2	2
BP	GO:1905517	macrophage migration	45337	61/18870	0.00105047	0.0105139	0.00437453	CSF1/MDK	2
BP	GO:0048762	mesenchymal cell differentiation	45366	262/18870	0.001064	0.0105567	0.00439234	SPRY2/SPRY1/MDK	3
BP	GO:0051653	spindle localization	45337	62/18870	0.00108499	0.0106722	0.00444037	SPRY2/SPRY1	2
BP	GO:0032615	interleukin-12 production	45337	64/18870	0.00115565	0.0111745	0.00464939	MAPK14/MDK	2
BP	GO:0032655	regulation of interleukin-12 production	45337	64/18870	0.00115565	0.0111745	0.00464939	MAPK14/MDK	2
BP	GO:0090596	sensory organ morphogenesis	45366	277/18870	0.0012492	0.0118373	0.00492514	SPRY2/EPHA2/LHX1	3
BP	GO:0001655	urogenital system development	45337	67/18870	0.00126568	0.0118373	0.00492514	AR/LHX1	2
BP	GO:0048645	animal organ formation	45337	67/18870	0.00126568	0.0118373	0.00492514	AR/SPRY1	2
BP	GO:0060675	ureteric bud morphogenesis	45337	67/18870	0.00126568	0.0118373	0.00492514	LHX1/TACSTD2	2
BP	GO:0072171	mesonephric tubule morphogenesis	45337	68/18870	0.00130344	0.0120913	0.00503082	LHX1/TACSTD2	2
BP	GO:0061448	connective tissue development	45366	285/18870	0.0013558	0.0123758	0.0051492	CSF1/MAPK14/MDK	3
BP	GO:0071900	regulation of protein serine/threonine kinase activity	45366	285/18870	0.0013558	0.0123758	0.0051492	SPRY2/SPRY1/PDGFA	3
BP	GO:0045165	cell fate commitment	45366	286/18870	0.00136952	0.0124018	0.00516002	TOX/SPRY2/AR	3
BP	GO:0043491	phosphatidylinositol 3-kinase/protein kinase B signal transduction	45366	290/18870	0.00142527	0.012805	0.00532778	SPRY2/PDGFA/EPHA2	3
BP	GO:0010632	regulation of epithelial cell migration	45366	295/18870	0.00149695	0.0132404	0.00550896	MET/EPHA2/TACSTD2	3
BP	GO:0048562	embryonic organ morphogenesis	45366	295/18870	0.00149695	0.0132404	0.00550896	SPRY2/EPHA2/LHX1	3
BP	GO:0035924	cellular response to vascular endothelial growth factor stimulus	45337	75/18870	0.00158272	0.0138914	0.00577983	SPRY2/MAPK14	2
BP	GO:0070373	negative regulation of ERK1 and ERK2 cascade	45337	77/18870	0.00166732	0.0144122	0.00599649	SPRY2/SPRY1	2
BP	GO:0072078	nephron tubule morphogenesis	45337	77/18870	0.00166732	0.0144122	0.00599649	LHX1/TACSTD2	2
BP	GO:0072088	nephron epithelium morphogenesis	45337	79/18870	0.00175403	0.0150477	0.00626092	LHX1/TACSTD2	2
BP	GO:0043588	skin development	45366	317/18870	0.00183931	0.015461	0.00643288	MET/PDGFA/EPHA2	3
BP	GO:0061333	renal tubule morphogenesis	45337	81/18870	0.00184286	0.015461	0.00643288	LHX1/TACSTD2	2
BP	GO:0072028	nephron morphogenesis	45337	81/18870	0.00184286	0.015461	0.00643288	LHX1/TACSTD2	2
BP	GO:1902105	regulation of leukocyte differentiation	45366	321/18870	0.00190639	0.0158773	0.00660608	TOX/CSF1/MDK	3
BP	GO:0060485	mesenchyme development	45366	327/18870	0.00200987	0.0166178	0.00691419	SPRY2/SPRY1/MDK	3
BP	GO:0048638	regulation of developmental growth	45366	328/18870	0.00202745	0.0166426	0.0069245	CSF1/AR/MAPK14	3
BP	GO:0051251	positive regulation of lymphocyte activation	45366	330/18870	0.0020629	0.0168127	0.00699526	TOX/CD55/MDK	3
BP	GO:0032956	regulation of actin cytoskeleton organization	45366	337/18870	0.00219005	0.017707	0.00736737	MET/PDGFA/TACSTD2	3
BP	GO:0014910	regulation of smooth muscle cell migration	45337	89/18870	0.0022192	0.017707	0.00736737	MDK/PDGFA	2
BP	GO:0046849	bone remodeling	45337	89/18870	0.0022192	0.017707	0.00736737	MDK/EPHA2	2
BP	GO:0045765	regulation of angiogenesis	45366	349/18870	0.00241925	0.0191692	0.00797573	SPRY2/MDK/EPHA2	3
BP	GO:0051492	regulation of stress fiber assembly	45337	94/18870	0.00247137	0.0193139	0.00803596	MET/TACSTD2	2
BP	GO:0051781	positive regulation of cell division	45337	94/18870	0.00247137	0.0193139	0.00803596	MDK/PDGFA	2
BP	GO:1901342	regulation of vasculature development	45366	354/18870	0.00251899	0.0194957	0.00811157	SPRY2/MDK/EPHA2	3
BP	GO:0031589	cell-substrate adhesion	45366	356/18870	0.0025596	0.0194957	0.00811157	CSF1/MDK/TACSTD2	3
BP	GO:0002690	positive regulation of leukocyte chemotaxis	45337	96/18870	0.00257587	0.0194957	0.00811157	CSF1/MDK	2
BP	GO:0014909	smooth muscle cell migration	45337	96/18870	0.00257587	0.0194957	0.00811157	MDK/PDGFA	2
BP	GO:0090287	regulation of cellular response to growth factor stimulus	45366	357/18870	0.00258006	0.0194957	0.00811157	SPRY2/SPRY1/HHIP	3
BP	GO:0009953	dorsal/ventral pattern formation	45337	97/18870	0.00262889	0.019605	0.00815706	HHIP/LHX1	2
BP	GO:1903035	negative regulation of response to wounding	45337	97/18870	0.00262889	0.019605	0.00815706	MDK/PDGFA	2
BP	GO:0060993	kidney morphogenesis	45337	98/18870	0.00268243	0.0198743	0.00826913	LHX1/TACSTD2	2
BP	GO:0034446	substrate adhesion-dependent cell spreading	45337	100/18870	0.00279105	0.020284	0.00843957	MDK/TACSTD2	2
BP	GO:0071901	negative regulation of protein serine/threonine kinase activity	45337	100/18870	0.00279105	0.020284	0.00843957	SPRY2/SPRY1	2
BP	GO:0072080	nephron tubule development	45337	100/18870	0.00279105	0.020284	0.00843957	LHX1/TACSTD2	2
BP	GO:0010631	epithelial cell migration	45366	372/18870	0.00289923	0.0209118	0.00870079	MET/EPHA2/TACSTD2	3
BP	GO:0045639	positive regulation of myeloid cell differentiation	45337	103/18870	0.00295782	0.0209118	0.00870079	CSF1/MAPK14	2
BP	GO:0090132	epithelium migration	45366	375/18870	0.00296587	0.0209118	0.00870079	MET/EPHA2/TACSTD2	3
BP	GO:0045936	negative regulation of phosphate metabolic process	45366	376/18870	0.00298829	0.0209118	0.00870079	SPRY2/SPRY1/PDGFA	3
BP	GO:0010563	negative regulation of phosphorus metabolic process	45366	377/18870	0.00301082	0.0209118	0.00870079	SPRY2/SPRY1/PDGFA	3
BP	GO:0021549	cerebellum development	45337	104/18870	0.00301443	0.0209118	0.00870079	MDK/LHX1	2
BP	GO:0061326	renal tubule development	45337	104/18870	0.00301443	0.0209118	0.00870079	LHX1/TACSTD2	2
BP	GO:0032970	regulation of actin filament-based process	45366	379/18870	0.00305619	0.0209118	0.00870079	MET/PDGFA/TACSTD2	3
BP	GO:0110020	regulation of actomyosin structure organization	45337	105/18870	0.00307156	0.0209118	0.00870079	MET/TACSTD2	2
BP	GO:0002696	positive regulation of leukocyte activation	45366	380/18870	0.00307904	0.0209118	0.00870079	TOX/CD55/MDK	3
BP	GO:0090130	tissue migration	45366	380/18870	0.00307904	0.0209118	0.00870079	MET/EPHA2/TACSTD2	3
BP	GO:0050863	regulation of T cell activation	45366	381/18870	0.00310199	0.020943	0.00871377	TOX/CD55/MDK	3
BP	GO:0032231	regulation of actin filament bundle assembly	45337	107/18870	0.00318733	0.0213177	0.00886968	MET/TACSTD2	2
BP	GO:0008544	epidermis development	45366	385/18870	0.00319486	0.0213177	0.00886968	MET/PDGFA/EPHA2	3
BP	GO:1903076	regulation of protein localization to plasma membrane	45337	108/18870	0.00324598	0.0215329	0.00895922	AR/EPHA2	2
BP	GO:0014812	muscle cell migration	45337	110/18870	0.0033648	0.0219385	0.00912797	MDK/PDGFA	2
BP	GO:0030038	contractile actin filament bundle assembly	45337	110/18870	0.0033648	0.0219385	0.00912797	MET/TACSTD2	2
BP	GO:0043149	stress fiber assembly	45337	110/18870	0.0033648	0.0219385	0.00912797	MET/TACSTD2	2
BP	GO:0030512	negative regulation of transforming growth factor beta receptor signaling pathway	45337	111/18870	0.00342497	0.0222039	0.0092384	SPRY2/SPRY1	2
BP	GO:0050867	positive regulation of cell activation	45366	396/18870	0.00345909	0.0222984	0.00927771	TOX/CD55/MDK	3
BP	GO:0022037	metencephalon development	45337	114/18870	0.0036085	0.0231309	0.00962409	MDK/LHX1	2
BP	GO:0002062	chondrocyte differentiation	45337	116/18870	0.00373337	0.0235542	0.0098002	MAPK14/MDK	2
BP	GO:0030900	forebrain development	45366	407/18870	0.00373646	0.0235542	0.0098002	TOX/MDK/LHX1	3
BP	GO:0050678	regulation of epithelial cell proliferation	45366	407/18870	0.00373646	0.0235542	0.0098002	AR/MDK/TACSTD2	3
BP	GO:0007178	transmembrane receptor protein serine/threonine kinase signaling pathway	45366	410/18870	0.00381442	0.0239135	0.0099497	SPRY2/MAPK14/SPRY1	3
BP	GO:0035710	CD4-positive, alpha-beta T cell activation	45337	119/18870	0.00392443	0.0244687	0.0101807	TOX/CD55	2
BP	GO:0072009	nephron epithelium development	45337	120/18870	0.00398912	0.0247369	0.0102923	LHX1/TACSTD2	2
BP	GO:0010811	positive regulation of cell-substrate adhesion	45337	123/18870	0.00418617	0.0258185	0.0107423	CSF1/MDK	2
BP	GO:0071675	regulation of mononuclear cell migration	45337	125/18870	0.00432001	0.0265007	0.0110262	CSF1/MDK	2
BP	GO:0030099	myeloid cell differentiation	45366	430/18870	0.00435984	0.026602	0.0110683	CSF1/MAPK14/EPHA2	3
BP	GO:0002688	regulation of leukocyte chemotaxis	45337	126/18870	0.00438768	0.0266295	0.0110798	CSF1/MDK	2
BP	GO:0090288	negative regulation of cellular response to growth factor stimulus	45337	127/18870	0.00445584	0.0269001	0.0111923	SPRY2/SPRY1	2
BP	GO:0001704	formation of primary germ layer	45337	128/18870	0.00452449	0.0270285	0.0112458	EPHA2/LHX1	2
BP	GO:0098773	skin epidermis development	45337	128/18870	0.00452449	0.0270285	0.0112458	MET/PDGFA	2
BP	GO:0045621	positive regulation of lymphocyte differentiation	45337	130/18870	0.00466328	0.0275689	0.0114706	TOX/MDK	2
BP	GO:0071621	granulocyte chemotaxis	45337	130/18870	0.00466328	0.0275689	0.0114706	CSF1/MDK	2
BP	GO:0010720	positive regulation of cell development	45366	444/18870	0.00476867	0.0280467	0.0116694	TOX/CSF1/MDK	3
BP	GO:0030168	platelet activation	45337	133/18870	0.00487513	0.0283802	0.0118082	MAPK14/PDGFA	2
BP	GO:0048593	camera-type eye morphogenesis	45337	133/18870	0.00487513	0.0283802	0.0118082	EPHA2/LHX1	2
BP	GO:0007498	mesoderm development	45337	136/18870	0.00509139	0.0294887	0.0122694	EPHA2/LHX1	2
BP	GO:1904375	regulation of protein localization to cell periphery	45337	137/18870	0.00516445	0.0297608	0.0123826	AR/EPHA2	2
BP	GO:0090090	negative regulation of canonical Wnt signaling pathway	45337	140/18870	0.00538655	0.0308847	0.0128502	MAPK14/MDK	2
BP	GO:0001889	liver development	45337	142/18870	0.00553703	0.0315888	0.0131432	MET/MDK	2
BP	GO:0043410	positive regulation of MAPK cascade	45366	474/18870	0.00572173	0.0324801	0.013514	SPRY2/AR/PDGFA	3
BP	GO:0061008	hepaticobiliary system development	45337	145/18870	0.00576638	0.0325715	0.013552	MET/MDK	2
BP	GO:0035264	multicellular organism growth	45337	147/18870	0.00592168	0.0330727	0.0137606	CSF1/AR	2
BP	GO:0032102	negative regulation of response to external stimulus	45366	481/18870	0.00595952	0.0330727	0.0137606	MAPK14/MDK/PDGFA	3
BP	GO:1903131	mononuclear cell differentiation	45366	481/18870	0.00595952	0.0330727	0.0137606	TOX/CSF1/MDK	3
BP	GO:0045785	positive regulation of cell adhesion	45366	482/18870	0.00599397	0.0330727	0.0137606	CD55/CSF1/MDK	3
BP	GO:0032946	positive regulation of mononuclear cell proliferation	45337	148/18870	0.00600005	0.0330727	0.0137606	CD55/CSF1	2
BP	GO:0002687	positive regulation of leukocyte migration	45337	149/18870	0.0060789	0.0333463	0.0138744	CSF1/MDK	2
BP	GO:0016525	negative regulation of angiogenesis	45337	150/18870	0.00615822	0.0336198	0.0139882	SPRY2/EPHA2	2
BP	GO:2000181	negative regulation of blood vessel morphogenesis	45337	152/18870	0.0063183	0.0343294	0.0142835	SPRY2/EPHA2	2
BP	GO:0022407	regulation of cell-cell adhesion	45366	493/18870	0.00638095	0.0344402	0.0143296	CD55/MAPK14/MDK	3
BP	GO:1901343	negative regulation of vasculature development	45337	153/18870	0.00639905	0.0344402	0.0143296	SPRY2/EPHA2	2
BP	GO:0001667	ameboidal-type cell migration	45366	497/18870	0.00652533	0.0347752	0.0144689	MET/EPHA2/TACSTD2	3
BP	GO:0001819	positive regulation of cytokine production	45366	499/18870	0.00659826	0.0347752	0.0144689	CD55/MAPK14/MDK	3
BP	GO:0030010	establishment of cell polarity	45337	156/18870	0.00664416	0.0347752	0.0144689	SPRY2/SPRY1	2
BP	GO:0046718	viral entry into host cell	45337	156/18870	0.00664416	0.0347752	0.0144689	CD55/EPHA2	2
BP	GO:0072006	nephron development	45337	156/18870	0.00664416	0.0347752	0.0144689	LHX1/TACSTD2	2
BP	GO:0097530	granulocyte migration	45337	156/18870	0.00664416	0.0347752	0.0144689	CSF1/MDK	2
BP	GO:0030902	hindbrain development	45337	157/18870	0.00672681	0.035047	0.014582	MDK/LHX1	2
BP	GO:0010976	positive regulation of neuron projection development	45337	158/18870	0.00680993	0.0353188	0.0146951	TOX/MDK	2
BP	GO:0017015	regulation of transforming growth factor beta receptor signaling pathway	45337	160/18870	0.00697759	0.0360246	0.0149888	SPRY2/SPRY1	2
BP	GO:0051017	actin filament bundle assembly	45337	161/18870	0.00706212	0.0362967	0.015102	MET/TACSTD2	2
BP	GO:0048592	eye morphogenesis	45337	162/18870	0.00714712	0.0363541	0.0151259	EPHA2/LHX1	2
BP	GO:0044409	entry into host	45337	163/18870	0.00723259	0.0363541	0.0151259	CD55/EPHA2	2
BP	GO:0051494	negative regulation of cytoskeleton organization	45337	163/18870	0.00723259	0.0363541	0.0151259	MET/TACSTD2	2
BP	GO:1902850	microtubule cytoskeleton organization involved in mitosis	45337	163/18870	0.00723259	0.0363541	0.0151259	SPRY2/SPRY1	2
BP	GO:1903844	regulation of cellular response to transforming growth factor beta stimulus	45337	163/18870	0.00723259	0.0363541	0.0151259	SPRY2/SPRY1	2
BP	GO:0061572	actin filament bundle organization	45337	165/18870	0.00740493	0.0370572	0.0154184	MET/TACSTD2	2
BP	GO:0070665	positive regulation of leukocyte proliferation	45337	166/18870	0.00749181	0.0373282	0.0155312	CD55/CSF1	2
BP	GO:0048639	positive regulation of developmental growth	45337	167/18870	0.00757914	0.0373685	0.0155479	CSF1/MAPK14	2
BP	GO:1902904	negative regulation of supramolecular fiber organization	45337	167/18870	0.00757914	0.0373685	0.0155479	MET/TACSTD2	2
BP	GO:0001886	endothelial cell morphogenesis	45306	10/18870	0.00792263	0.0373685	0.0155479	MET	1
BP	GO:0002361	CD4-positive, CD25-positive, alpha-beta regulatory T cell differentiation	45306	10/18870	0.00792263	0.0373685	0.0155479	TOX	1
BP	GO:0045657	positive regulation of monocyte differentiation	45306	10/18870	0.00792263	0.0373685	0.0155479	CSF1	1
BP	GO:0048703	embryonic viscerocranium morphogenesis	45306	10/18870	0.00792263	0.0373685	0.0155479	LHX1	1
BP	GO:0060068	vagina development	45306	10/18870	0.00792263	0.0373685	0.0155479	LHX1	1
BP	GO:0060768	regulation of epithelial cell proliferation involved in prostate gland development	45306	10/18870	0.00792263	0.0373685	0.0155479	AR	1
BP	GO:0070391	response to lipoteichoic acid	45306	10/18870	0.00792263	0.0373685	0.0155479	MAPK14	1
BP	GO:0071223	cellular response to lipoteichoic acid	45306	10/18870	0.00792263	0.0373685	0.0155479	MAPK14	1
BP	GO:2000347	positive regulation of hepatocyte proliferation	45306	10/18870	0.00792263	0.0373685	0.0155479	MDK	1
BP	GO:2000563	positive regulation of CD4-positive, alpha-beta T cell proliferation	45306	10/18870	0.00792263	0.0373685	0.0155479	CD55	1
BP	GO:0051897	positive regulation of phosphatidylinositol 3-kinase/protein kinase B signal transduction	45337	171/18870	0.00793314	0.0373685	0.0155479	SPRY2/PDGFA	2
BP	GO:0002262	myeloid cell homeostasis	45337	173/18870	0.00811291	0.0373685	0.0155479	CSF1/MAPK14	2
BP	GO:0030178	negative regulation of Wnt signaling pathway	45337	173/18870	0.00811291	0.0373685	0.0155479	MAPK14/MDK	2
BP	GO:1903034	regulation of response to wounding	45337	173/18870	0.00811291	0.0373685	0.0155479	MDK/PDGFA	2
BP	GO:0043409	negative regulation of MAPK cascade	45337	176/18870	0.00838603	0.0373685	0.0155479	SPRY2/SPRY1	2
BP	GO:0001764	neuron migration	45337	177/18870	0.00847798	0.0373685	0.0155479	MDK/LHX1	2
BP	GO:0006469	negative regulation of protein kinase activity	45337	179/18870	0.00866327	0.0373685	0.0155479	SPRY2/SPRY1	2
BP	GO:0090101	negative regulation of transmembrane receptor protein serine/threonine kinase signaling pathway	45337	179/18870	0.00866327	0.0373685	0.0155479	SPRY2/SPRY1	2
BP	GO:0001865	NK T cell differentiation	45306	11/18870	0.00871167	0.0373685	0.0155479	TOX	1
BP	GO:0002158	osteoclast proliferation	45306	11/18870	0.00871167	0.0373685	0.0155479	CSF1	1
BP	GO:0007614	short-term memory	45306	11/18870	0.00871167	0.0373685	0.0155479	MDK	1
BP	GO:0021936	regulation of cerebellar granule cell precursor proliferation	45306	11/18870	0.00871167	0.0373685	0.0155479	LHX1	1
BP	GO:0032525	somite rostral/caudal axis specification	45306	11/18870	0.00871167	0.0373685	0.0155479	LHX1	1
BP	GO:0033148	positive regulation of intracellular estrogen receptor signaling pathway	45306	11/18870	0.00871167	0.0373685	0.0155479	AR	1
BP	GO:0033327	Leydig cell differentiation	45306	11/18870	0.00871167	0.0373685	0.0155479	AR	1
BP	GO:0060601	lateral sprouting from an epithelium	45306	11/18870	0.00871167	0.0373685	0.0155479	AR	1
BP	GO:0060736	prostate gland growth	45306	11/18870	0.00871167	0.0373685	0.0155479	AR	1
BP	GO:0060742	epithelial cell differentiation involved in prostate gland development	45306	11/18870	0.00871167	0.0373685	0.0155479	AR	1
BP	GO:0060767	epithelial cell proliferation involved in prostate gland development	45306	11/18870	0.00871167	0.0373685	0.0155479	AR	1
BP	GO:0072178	nephric duct morphogenesis	45306	11/18870	0.00871167	0.0373685	0.0155479	LHX1	1
BP	GO:0090009	primitive streak formation	45306	11/18870	0.00871167	0.0373685	0.0155479	LHX1	1
BP	GO:0097278	complement-dependent cytotoxicity	45306	11/18870	0.00871167	0.0373685	0.0155479	CD55	1
BP	GO:1904238	pericyte cell differentiation	45306	11/18870	0.00871167	0.0373685	0.0155479	EPHA2	1
BP	GO:1904424	regulation of GTP binding	45306	11/18870	0.00871167	0.0373685	0.0155479	MET	1
BP	GO:1905651	regulation of artery morphogenesis	45306	11/18870	0.00871167	0.0373685	0.0155479	MDK	1
BP	GO:0021953	central nervous system neuron differentiation	45337	181/18870	0.00885039	0.0374011	0.0155615	TOX/LHX1	2
BP	GO:0045580	regulation of T cell differentiation	45337	181/18870	0.00885039	0.0374011	0.0155615	TOX/MDK	2
BP	GO:0046631	alpha-beta T cell activation	45337	181/18870	0.00885039	0.0374011	0.0155615	TOX/CD55	2
BP	GO:1905475	regulation of protein localization to membrane	45337	181/18870	0.00885039	0.0374011	0.0155615	AR/EPHA2	2
BP	GO:0048771	tissue remodeling	45337	184/18870	0.00913447	0.0379785	0.0158018	MDK/EPHA2	2
BP	GO:0051302	regulation of cell division	45337	186/18870	0.00932613	0.0379785	0.0158018	MDK/PDGFA	2
BP	GO:0021527	spinal cord association neuron differentiation	45306	12/18870	0.00950011	0.0379785	0.0158018	LHX1	1
BP	GO:0033145	positive regulation of intracellular steroid hormone receptor signaling pathway	45306	12/18870	0.00950011	0.0379785	0.0158018	AR	1
BP	GO:0035112	genitalia morphogenesis	45306	12/18870	0.00950011	0.0379785	0.0158018	AR	1
BP	GO:0042117	monocyte activation	45306	12/18870	0.00950011	0.0379785	0.0158018	CSF1	1
BP	GO:0042364	water-soluble vitamin biosynthetic process	45306	12/18870	0.00950011	0.0379785	0.0158018	SLC19A2	1
BP	GO:0042487	regulation of odontogenesis of dentin-containing tooth	45306	12/18870	0.00950011	0.0379785	0.0158018	CSF1	1
BP	GO:0048012	hepatocyte growth factor receptor signaling pathway	45306	12/18870	0.00950011	0.0379785	0.0158018	MET	1
BP	GO:0071394	cellular response to testosterone stimulus	45306	12/18870	0.00950011	0.0379785	0.0158018	AR	1
BP	GO:0071493	cellular response to UV-B	45306	12/18870	0.00950011	0.0379785	0.0158018	MAPK14	1
BP	GO:0072182	regulation of nephron tubule epithelial cell differentiation	45306	12/18870	0.00950011	0.0379785	0.0158018	LHX1	1
BP	GO:0106014	regulation of inflammatory response to wounding	45306	12/18870	0.00950011	0.0379785	0.0158018	MDK	1
BP	GO:1901299	negative regulation of hydrogen peroxide-mediated programmed cell death	45306	12/18870	0.00950011	0.0379785	0.0158018	MET	1
BP	GO:1901535	regulation of DNA demethylation	45306	12/18870	0.00950011	0.0379785	0.0158018	TOX	1
BP	GO:0044000	movement in host	45337	188/18870	0.0095196	0.0379785	0.0158018	CD55/EPHA2	2
BP	GO:0031345	negative regulation of cell projection organization	45337	192/18870	0.00991194	0.0392595	0.0163347	SPRY2/TACSTD2	2
BP	GO:0033673	negative regulation of kinase activity	45337	193/18870	0.0100111	0.0392595	0.0163347	SPRY2/SPRY1	2
BP	GO:0021681	cerebellar granular layer development	45306	13/18870	0.010288	0.0392595	0.0163347	MDK	1
BP	GO:0021702	cerebellar Purkinje cell differentiation	45306	13/18870	0.010288	0.0392595	0.0163347	LHX1	1
BP	GO:0032823	regulation of natural killer cell differentiation	45306	13/18870	0.010288	0.0392595	0.0163347	TOX	1
BP	GO:0035331	negative regulation of hippo signaling	45306	13/18870	0.010288	0.0392595	0.0163347	MAPK14	1
BP	GO:0036006	cellular response to macrophage colony-stimulating factor stimulus	45306	13/18870	0.010288	0.0392595	0.0163347	CSF1	1
BP	GO:0043568	positive regulation of insulin-like growth factor receptor signaling pathway	45306	13/18870	0.010288	0.0392595	0.0163347	AR	1
BP	GO:0045916	negative regulation of complement activation	45306	13/18870	0.010288	0.0392595	0.0163347	CD55	1
BP	GO:0061517	macrophage proliferation	45306	13/18870	0.010288	0.0392595	0.0163347	CSF1	1
BP	GO:0070493	thrombin-activated receptor signaling pathway	45306	13/18870	0.010288	0.0392595	0.0163347	MET	1
BP	GO:0097475	motor neuron migration	45306	13/18870	0.010288	0.0392595	0.0163347	LHX1	1
BP	GO:1903977	positive regulation of glial cell migration	45306	13/18870	0.010288	0.0392595	0.0163347	CSF1	1
BP	GO:0007369	gastrulation	45337	197/18870	0.0104124	0.039602	0.0164772	EPHA2/LHX1	2
BP	GO:0001935	endothelial cell proliferation	45337	202/18870	0.010924	0.0403734	0.0167982	MDK/EPHA2	2
BP	GO:0050728	negative regulation of inflammatory response	45337	202/18870	0.010924	0.0403734	0.0167982	MAPK14/MDK	2
BP	GO:0120032	regulation of plasma membrane bounded cell projection assembly	45337	203/18870	0.0110277	0.0403734	0.0167982	EPHA2/TACSTD2	2
BP	GO:0030238	male sex determination	45306	14/18870	0.0110753	0.0403734	0.0167982	AR	1
BP	GO:0035791	platelet-derived growth factor receptor-beta signaling pathway	45306	14/18870	0.0110753	0.0403734	0.0167982	PDGFA	1
BP	GO:0045059	positive thymic T cell selection	45306	14/18870	0.0110753	0.0403734	0.0167982	TOX	1
BP	GO:0045117	azole transmembrane transport	45306	14/18870	0.0110753	0.0403734	0.0167982	SLC19A2	1
BP	GO:0070307	lens fiber cell development	45306	14/18870	0.0110753	0.0403734	0.0167982	EPHA2	1
BP	GO:0072160	nephron tubule epithelial cell differentiation	45306	14/18870	0.0110753	0.0403734	0.0167982	LHX1	1
BP	GO:0072283	metanephric renal vesicle morphogenesis	45306	14/18870	0.0110753	0.0403734	0.0167982	LHX1	1
BP	GO:0072672	neutrophil extravasation	45306	14/18870	0.0110753	0.0403734	0.0167982	MDK	1
BP	GO:1900025	negative regulation of substrate adhesion-dependent cell spreading	45306	14/18870	0.0110753	0.0403734	0.0167982	TACSTD2	1
BP	GO:1901298	regulation of hydrogen peroxide-mediated programmed cell death	45306	14/18870	0.0110753	0.0403734	0.0167982	MET	1
BP	GO:0050777	negative regulation of immune response	45337	205/18870	0.0112363	0.0407004	0.0169343	CD55/MAPK14	2
BP	GO:0060491	regulation of cell projection assembly	45337	205/18870	0.0112363	0.0407004	0.0169343	EPHA2/TACSTD2	2
BP	GO:0051216	cartilage development	45337	207/18870	0.0114467	0.0412008	0.0171425	MAPK14/MDK	2
BP	GO:0071674	mononuclear cell migration	45337	207/18870	0.0114467	0.0412008	0.0171425	CSF1/MDK	2
BP	GO:0031032	actomyosin structure organization	45337	208/18870	0.0115525	0.0413211	0.0171925	MET/TACSTD2	2
BP	GO:0031330	negative regulation of cellular catabolic process	45337	208/18870	0.0115525	0.0413211	0.0171925	MET/MAPK14	2
BP	GO:0010838	positive regulation of keratinocyte proliferation	45306	15/18870	0.0118619	0.0414273	0.0172367	MDK	1
BP	GO:0021694	cerebellar Purkinje cell layer formation	45306	15/18870	0.0118619	0.0414273	0.0172367	LHX1	1
BP	GO:0043374	CD8-positive, alpha-beta T cell differentiation	45306	15/18870	0.0118619	0.0414273	0.0172367	TOX	1
BP	GO:0044849	estrous cycle	45306	15/18870	0.0118619	0.0414273	0.0172367	MDK	1
BP	GO:0060572	morphogenesis of an epithelial bud	45306	15/18870	0.0118619	0.0414273	0.0172367	AR	1
BP	GO:0072176	nephric duct development	45306	15/18870	0.0118619	0.0414273	0.0172367	LHX1	1
BP	GO:2001028	positive regulation of endothelial cell chemotaxis	45306	15/18870	0.0118619	0.0414273	0.0172367	MET	1
BP	GO:0051701	biological process involved in interaction with host	45337	211/18870	0.0118727	0.0414273	0.0172367	CD55/EPHA2	2
BP	GO:0045619	regulation of lymphocyte differentiation	45337	212/18870	0.0119803	0.0416753	0.0173399	TOX/MDK	2
BP	GO:0009612	response to mechanical stimulus	45337	213/18870	0.0120883	0.0417962	0.0173902	MAPK14/MDK	2
BP	GO:0045637	regulation of myeloid cell differentiation	45337	213/18870	0.0120883	0.0417962	0.0173902	CSF1/MAPK14	2
BP	GO:0050679	positive regulation of epithelial cell proliferation	45337	218/18870	0.0126349	0.0421972	0.017557	AR/MDK	2
BP	GO:0070374	positive regulation of ERK1 and ERK2 cascade	45337	218/18870	0.0126349	0.0421972	0.017557	SPRY2/PDGFA	2
BP	GO:0021534	cell proliferation in hindbrain	45306	16/18870	0.0126481	0.0421972	0.017557	LHX1	1
BP	GO:0021924	cell proliferation in external granule layer	45306	16/18870	0.0126481	0.0421972	0.017557	LHX1	1
BP	GO:0021930	cerebellar granule cell precursor proliferation	45306	16/18870	0.0126481	0.0421972	0.017557	LHX1	1
BP	GO:0045651	positive regulation of macrophage differentiation	45306	16/18870	0.0126481	0.0421972	0.017557	CSF1	1
BP	GO:0072520	seminiferous tubule development	45306	16/18870	0.0126481	0.0421972	0.017557	AR	1
BP	GO:0072531	pyrimidine-containing compound transmembrane transport	45306	16/18870	0.0126481	0.0421972	0.017557	SLC19A2	1
BP	GO:0090336	positive regulation of brown fat cell differentiation	45306	16/18870	0.0126481	0.0421972	0.017557	MAPK14	1
BP	GO:1901741	positive regulation of myoblast fusion	45306	16/18870	0.0126481	0.0421972	0.017557	MAPK14	1
BP	GO:2000345	regulation of hepatocyte proliferation	45306	16/18870	0.0126481	0.0421972	0.017557	MDK	1
BP	GO:2000696	regulation of epithelial cell differentiation involved in kidney development	45306	16/18870	0.0126481	0.0421972	0.017557	LHX1	1
BP	GO:0050866	negative regulation of cell activation	45337	223/18870	0.0131923	0.0431767	0.0179645	MDK/PDGFA	2
BP	GO:0007596	blood coagulation	45337	224/18870	0.0133051	0.0431767	0.0179645	MAPK14/PDGFA	2
BP	GO:0051348	negative regulation of transferase activity	45337	225/18870	0.0134182	0.0431767	0.0179645	SPRY2/SPRY1	2
BP	GO:0002921	negative regulation of humoral immune response	45306	17/18870	0.0134336	0.0431767	0.0179645	CD55	1
BP	GO:0010421	hydrogen peroxide-mediated programmed cell death	45306	17/18870	0.0134336	0.0431767	0.0179645	MET	1
BP	GO:0010470	regulation of gastrulation	45306	17/18870	0.0134336	0.0431767	0.0179645	LHX1	1
BP	GO:0010544	negative regulation of platelet activation	45306	17/18870	0.0134336	0.0431767	0.0179645	PDGFA	1
BP	GO:0010831	positive regulation of myotube differentiation	45306	17/18870	0.0134336	0.0431767	0.0179645	MAPK14	1
BP	GO:0036005	response to macrophage colony-stimulating factor	45306	17/18870	0.0134336	0.0431767	0.0179645	CSF1	1
BP	GO:0071071	regulation of phospholipid biosynthetic process	45306	17/18870	0.0134336	0.0431767	0.0179645	PDGFA	1
BP	GO:0072077	renal vesicle morphogenesis	45306	17/18870	0.0134336	0.0431767	0.0179645	LHX1	1
BP	GO:0072224	metanephric glomerulus development	45306	17/18870	0.0134336	0.0431767	0.0179645	LHX1	1
BP	GO:1900747	negative regulation of vascular endothelial growth factor signaling pathway	45306	17/18870	0.0134336	0.0431767	0.0179645	SPRY2	1
BP	GO:0071222	cellular response to lipopolysaccharide	45337	226/18870	0.0135319	0.0433704	0.0180451	CD55/MAPK14	2
BP	GO:0007163	establishment or maintenance of cell polarity	45337	228/18870	0.0137604	0.0438468	0.0182434	SPRY2/SPRY1	2
BP	GO:0007179	transforming growth factor beta receptor signaling pathway	45337	229/18870	0.0138753	0.0438468	0.0182434	SPRY2/SPRY1	2
BP	GO:0050817	coagulation	45337	229/18870	0.0138753	0.0438468	0.0182434	MAPK14/PDGFA	2
BP	GO:0002685	regulation of leukocyte migration	45337	230/18870	0.0139906	0.0438468	0.0182434	CSF1/MDK	2
BP	GO:0007599	hemostasis	45337	231/18870	0.0141063	0.0438468	0.0182434	MAPK14/PDGFA	2
BP	GO:0010594	regulation of endothelial cell migration	45337	231/18870	0.0141063	0.0438468	0.0182434	MET/EPHA2	2
BP	GO:0001946	lymphangiogenesis	45306	18/18870	0.0142185	0.0438468	0.0182434	EPHA2	1
BP	GO:0002693	positive regulation of cellular extravasation	45306	18/18870	0.0142185	0.0438468	0.0182434	MDK	1
BP	GO:0042481	regulation of odontogenesis	45306	18/18870	0.0142185	0.0438468	0.0182434	CSF1	1
BP	GO:0045945	positive regulation of transcription by RNA polymerase III	45306	18/18870	0.0142185	0.0438468	0.0182434	AR	1
BP	GO:0048535	lymph node development	45306	18/18870	0.0142185	0.0438468	0.0182434	TOX	1
BP	GO:0072087	renal vesicle development	45306	18/18870	0.0142185	0.0438468	0.0182434	LHX1	1
BP	GO:0072189	ureter development	45306	18/18870	0.0142185	0.0438468	0.0182434	LHX1	1
BP	GO:0090190	positive regulation of branching involved in ureteric bud morphogenesis	45306	18/18870	0.0142185	0.0438468	0.0182434	LHX1	1
BP	GO:0001502	cartilage condensation	45306	19/18870	0.0150029	0.0448123	0.0186451	MAPK14	1
BP	GO:0002523	leukocyte migration involved in inflammatory response	45306	19/18870	0.0150029	0.0448123	0.0186451	MDK	1
BP	GO:0010744	positive regulation of macrophage derived foam cell differentiation	45306	19/18870	0.0150029	0.0448123	0.0186451	CSF1	1
BP	GO:0010801	negative regulation of peptidyl-threonine phosphorylation	45306	19/18870	0.0150029	0.0448123	0.0186451	SPRY2	1
BP	GO:0021692	cerebellar Purkinje cell layer morphogenesis	45306	19/18870	0.0150029	0.0448123	0.0186451	LHX1	1
BP	GO:0030540	female genitalia development	45306	19/18870	0.0150029	0.0448123	0.0186451	LHX1	1
BP	GO:0030903	notochord development	45306	19/18870	0.0150029	0.0448123	0.0186451	EPHA2	1
BP	GO:0036342	post-anal tail morphogenesis	45306	19/18870	0.0150029	0.0448123	0.0186451	EPHA2	1
BP	GO:0071391	cellular response to estrogen stimulus	45306	19/18870	0.0150029	0.0448123	0.0186451	AR	1
BP	GO:0097468	programmed cell death in response to reactive oxygen species	45306	19/18870	0.0150029	0.0448123	0.0186451	MET	1
BP	GO:1902548	negative regulation of cellular response to vascular endothelial growth factor stimulus	45306	19/18870	0.0150029	0.0448123	0.0186451	SPRY2	1
BP	GO:2001224	positive regulation of neuron migration	45306	19/18870	0.0150029	0.0448123	0.0186451	MDK	1
BP	GO:0071219	cellular response to molecule of bacterial origin	45337	239/18870	0.0150473	0.0448276	0.0186515	CD55/MAPK14	2
BP	GO:0030595	leukocyte chemotaxis	45337	240/18870	0.0151668	0.045066	0.0187507	CSF1/MDK	2
BP	GO:0032944	regulation of mononuclear cell proliferation	45337	242/18870	0.0154071	0.0455427	0.018949	CD55/CSF1	2
BP	GO:0097529	myeloid leukocyte migration	45337	242/18870	0.0154071	0.0455427	0.018949	CSF1/MDK	2
BP	GO:0021516	dorsal spinal cord development	45306	20/18870	0.0157867	0.0461861	0.0192167	LHX1	1
BP	GO:0045655	regulation of monocyte differentiation	45306	20/18870	0.0157867	0.0461861	0.0192167	CSF1	1
BP	GO:0060749	mammary gland alveolus development	45306	20/18870	0.0157867	0.0461861	0.0192167	AR	1
BP	GO:0061377	mammary gland lobule development	45306	20/18870	0.0157867	0.0461861	0.0192167	AR	1
BP	GO:0048863	stem cell differentiation	45337	246/18870	0.0158926	0.0463771	0.0192962	MAPK14/TACSTD2	2
BP	GO:0050870	positive regulation of T cell activation	45337	251/18870	0.0165088	0.0471476	0.0196167	CD55/MDK	2
BP	GO:0001780	neutrophil homeostasis	45306	21/18870	0.0165698	0.0471476	0.0196167	CSF1	1
BP	GO:0010224	response to UV-B	45306	21/18870	0.0165698	0.0471476	0.0196167	MAPK14	1
BP	GO:0032495	response to muramyl dipeptide	45306	21/18870	0.0165698	0.0471476	0.0196167	MAPK14	1
BP	GO:0035024	negative regulation of Rho protein signal transduction	45306	21/18870	0.0165698	0.0471476	0.0196167	MET	1
BP	GO:0035461	vitamin transmembrane transport	45306	21/18870	0.0165698	0.0471476	0.0196167	SLC19A2	1
BP	GO:0060445	branching involved in salivary gland morphogenesis	45306	21/18870	0.0165698	0.0471476	0.0196167	PDGFA	1
BP	GO:1901739	regulation of myoblast fusion	45306	21/18870	0.0165698	0.0471476	0.0196167	MAPK14	1
BP	GO:1903975	regulation of glial cell migration	45306	21/18870	0.0165698	0.0471476	0.0196167	CSF1	1
BP	GO:2000738	positive regulation of stem cell differentiation	45306	21/18870	0.0165698	0.0471476	0.0196167	TACSTD2	1
BP	GO:0045927	positive regulation of growth	45337	256/18870	0.0171352	0.0482906	0.0200923	CSF1/MAPK14	2
BP	GO:0001649	osteoblast differentiation	45337	257/18870	0.0172617	0.0482906	0.0200923	MAPK14/EPHA2	2
BP	GO:0002089	lens morphogenesis in camera-type eye	45306	22/18870	0.0173525	0.0482906	0.0200923	EPHA2	1
BP	GO:0007398	ectoderm development	45306	22/18870	0.0173525	0.0482906	0.0200923	LHX1	1
BP	GO:0007530	sex determination	45306	22/18870	0.0173525	0.0482906	0.0200923	AR	1
BP	GO:0030449	regulation of complement activation	45306	22/18870	0.0173525	0.0482906	0.0200923	CD55	1
BP	GO:0035739	CD4-positive, alpha-beta T cell proliferation	45306	22/18870	0.0173525	0.0482906	0.0200923	CD55	1
BP	GO:2000561	regulation of CD4-positive, alpha-beta T cell proliferation	45306	22/18870	0.0173525	0.0482906	0.0200923	CD55	1
BP	GO:2000810	regulation of bicellular tight junction assembly	45306	22/18870	0.0173525	0.0482906	0.0200923	EPHA2	1
BP	GO:0060828	regulation of canonical Wnt signaling pathway	45337	262/18870	0.0179002	0.0490319	0.0204007	MAPK14/MDK	2
BP	GO:0021533	cell differentiation in hindbrain	45306	23/18870	0.0181345	0.0490319	0.0204007	LHX1	1
BP	GO:0021542	dentate gyrus development	45306	23/18870	0.0181345	0.0490319	0.0204007	MDK	1
BP	GO:0036303	lymph vessel morphogenesis	45306	23/18870	0.0181345	0.0490319	0.0204007	EPHA2	1
BP	GO:0040019	positive regulation of embryonic development	45306	23/18870	0.0181345	0.0490319	0.0204007	LHX1	1
BP	GO:0043373	CD4-positive, alpha-beta T cell lineage commitment	45306	23/18870	0.0181345	0.0490319	0.0204007	TOX	1
BP	GO:0045061	thymic T cell selection	45306	23/18870	0.0181345	0.0490319	0.0204007	TOX	1
BP	GO:0046058	cAMP metabolic process	45306	23/18870	0.0181345	0.0490319	0.0204007	EPHA2	1
BP	GO:0060065	uterus development	45306	23/18870	0.0181345	0.0490319	0.0204007	LHX1	1
BP	GO:0072574	hepatocyte proliferation	45306	23/18870	0.0181345	0.0490319	0.0204007	MDK	1
BP	GO:0072575	epithelial cell proliferation involved in liver morphogenesis	45306	23/18870	0.0181345	0.0490319	0.0204007	MDK	1
BP	GO:0098743	cell aggregation	45306	23/18870	0.0181345	0.0490319	0.0204007	MAPK14	1
BP	GO:0071216	cellular response to biotic stimulus	45337	265/18870	0.0182882	0.0493306	0.020525	CD55/MAPK14	2
BP	GO:0070663	regulation of leukocyte proliferation	45337	267/18870	0.0185489	0.0499157	0.0207685	CD55/CSF1	2
MF	GO:0008083	growth factor activity	45366	162/18496	0.000277759	0.0191653	0.00935608	CSF1/MDK/PDGFA	3
MF	GO:0004714	transmembrane receptor protein tyrosine kinase activity	45337	60/18496	0.00105745	0.0258099	0.0125998	MET/EPHA2	2
MF	GO:0001618	virus receptor activity	45337	79/18496	0.00182438	0.0258099	0.0125998	CD55/EPHA2	2
MF	GO:0019199	transmembrane receptor protein kinase activity	45337	79/18496	0.00182438	0.0258099	0.0125998	MET/EPHA2	2
MF	GO:0140272	exogenous protein binding	45337	80/18496	0.00187028	0.0258099	0.0125998	CD55/EPHA2	2
MF	GO:0019838	growth factor binding	45337	135/18496	0.00521741	0.0482773	0.0235679	PDGFA/EPHA2	2
MF	GO:0004713	protein tyrosine kinase activity	45337	138/18496	0.00544511	0.0482773	0.0235679	MET/EPHA2	2
MF	GO:0019903	protein phosphatase binding	45337	142/18496	0.00575575	0.0482773	0.0235679	MET/MAPK14	2
MF	GO:0035374	chondroitin sulfate binding	45306	10/18496	0.00808229	0.0482773	0.0235679	MDK	1
MF	GO:0034056	estrogen response element binding	45306	11/18496	0.00888716	0.0482773	0.0235679	AR	1
MF	GO:0048407	platelet-derived growth factor binding	45306	11/18496	0.00888716	0.0482773	0.0235679	PDGFA	1
MF	GO:0055105	ubiquitin-protein transferase inhibitor activity	45306	11/18496	0.00888716	0.0482773	0.0235679	SPRY2	1
MF	GO:0017154	semaphorin receptor activity	45306	12/18496	0.00969141	0.0482773	0.0235679	MET	1
MF	GO:0019902	phosphatase binding	45337	189/18496	0.00999256	0.0482773	0.0235679	MET/MAPK14	2
MF	GO:1901474	azole transmembrane transporter activity	45306	13/18496	0.0104951	0.0482773	0.0235679	SLC19A2	1
MF	GO:0005161	platelet-derived growth factor receptor binding	45306	14/18496	0.0112981	0.0487231	0.0237855	PDGFA	1
