# Supplementary material for: Machine learning-based diagnostic model of lymphatics-associated genes for new therapeutic target analysis in intervertebral disc degeneration
Source: Front Immunol. 2024 Dec 4;15:1441028. doi: 10.3389/fimmu.2024.1441028 (PMC11652530; doi:10.3389/fimmu.2024.1441028)
Supplement: Supplementary file 3 [file Table3.xlsx]

## Sheet: Sheet1
ID	Description	GeneRatio	BgRatio	pvalue	p.adjust	qvalue	geneID	Count
DOID:0060099	musculoskeletal system benign neoplasm	45396	56/10312	7.4986e-07	0.000165693	9.29168e-05	CSF1/MET/AR/PDGFA	4
DOID:0060100	musculoskeletal system cancer	45487	468/10312	9.86268e-07	0.000165693	9.29168e-05	CSF1/MET/AR/MAPK14/SPRY1/PDGFA/EPHA2	7
DOID:289	endometriosis	45396	125/10312	1.87497e-05	0.00126089	0.000707077	CSF1/AR/MDK/PDGFA	4
DOID:1542	head and neck carcinoma	45426	269/10312	1.9211e-05	0.00126089	0.000707077	CSF1/MET/AR/MDK/EPHA2	5
DOID:11934	head and neck cancer	45426	276/10312	2.1752e-05	0.00126089	0.000707077	CSF1/MET/AR/MDK/EPHA2	5
DOID:2871	endometrial carcinoma	45396	136/10312	2.61514e-05	0.00126089	0.000707077	CD55/MET/AR/MDK	4
DOID:184	bone cancer	45426	287/10312	2.62685e-05	0.00126089	0.000707077	MET/AR/MAPK14/PDGFA/EPHA2	5
DOID:0060123	connective tissue benign neoplasm	45365	47/10312	3.11861e-05	0.00130982	0.000734514	CSF1/MET/AR	3
DOID:10286	prostate carcinoma	45396	182/10312	8.18306e-05	0.00305501	0.00171318	MET/AR/PDGFA/EPHA2	4
DOID:8549	chronic ulcer of skin	45336	11/10312	9.34882e-05	0.0031412	0.00176151	MET/PDGFA	2
DOID:201	connective tissue cancer	45426	392/10312	0.000116589	0.00356127	0.00199708	MET/AR/MAPK14/PDGFA/EPHA2	5
DOID:5520	head and neck squamous cell carcinoma	45396	208/10312	0.000137356	0.00384597	0.00215673	CSF1/MET/MDK/EPHA2	4
DOID:1380	endometrial cancer	45396	214/10312	0.000153307	0.0039624	0.00222202	CD55/MET/AR/MDK	4
DOID:363	uterine cancer	45396	219/10312	0.000167595	0.00402228	0.0022556	CD55/MET/AR/MDK	4
DOID:3347	osteosarcoma	45396	233/10312	0.000212746	0.0047655	0.00267238	MET/MAPK14/PDGFA/EPHA2	4
DOID:200	benign giant cell tumor	45336	18/10312	0.000258658	0.00538795	0.00302144	CSF1/MET	2
DOID:0060094	bone benign neoplasm	45336	19/10312	0.000288864	0.00538795	0.00302144	CSF1/MET	2
DOID:3302	chordoma	45336	20/10312	0.000320711	0.00538795	0.00302144	MET/AR	2
DOID:3303	notochordal cancer	45336	20/10312	0.000320711	0.00538795	0.00302144	MET/AR	2
DOID:452	pleomorphic adenoma	45336	20/10312	0.000320711	0.00538795	0.00302144	AR/PDGFA	2
DOID:3459	breast carcinoma	45426	493/10312	0.000341934	0.00547095	0.00306798	CD55/CSF1/MET/AR/MAPK14	5
DOID:0080639	bone sarcoma	45396	275/10312	0.000401015	0.0061246	0.00343453	MET/MAPK14/PDGFA/EPHA2	4
DOID:4045	muscle cancer	45365	115/10312	0.000449664	0.006569	0.00368374	CSF1/MET/SPRY1	3
DOID:0050624	gastrointestinal system benign neoplasm	45365	125/10312	0.00057406	0.00803684	0.00450687	MET/AR/PDGFA	3
DOID:1993	rectum cancer	45336	29/10312	0.000680541	0.00914647	0.00512913	CD55/MAPK14	2
DOID:3443	mammary Paget's disease	45336	33/10312	0.000882297	0.011402	0.00639397	CSF1/MAPK14	2
DOID:3070	high grade glioma	45396	347/10312	0.000964935	0.0120081	0.00673386	CSF1/MET/MDK/PDGFA	4
DOID:1074	kidney failure	45396	360/10312	0.00110715	0.0132858	0.00745039	CSF1/MET/AR/SLC19A2	4
DOID:2621	autonomic nervous system neoplasm	45396	386/10312	0.00143522	0.0160744	0.00901417	SPRY2/CD55/MDK/EPHA2	4
DOID:769	neuroblastoma	45396	386/10312	0.00143522	0.0160744	0.00901417	SPRY2/CD55/MDK/EPHA2	4
DOID:255	hemangioma	45336	45/10312	0.00163898	0.0166379	0.00933013	AR/PDGFA	2
DOID:4780	anti-basement membrane glomerulonephritis	45336	45/10312	0.00163898	0.0166379	0.00933013	CSF1/MAPK14	2
DOID:9808	Goodpasture syndrome	45336	45/10312	0.00163898	0.0166379	0.00933013	CSF1/MAPK14	2
DOID:219	colon cancer	45396	403/10312	0.00168359	0.0166379	0.00933013	MET/MAPK14/MDK/TACSTD2	4
DOID:1192	peripheral nervous system neoplasm	45396	409/10312	0.00177805	0.0166774	0.0093523	SPRY2/CD55/MDK/EPHA2	4
DOID:2526	prostate adenocarcinoma	45336	47/10312	0.00178686	0.0166774	0.0093523	AR/PDGFA	2
DOID:0060091	cardiovascular organ benign neoplasm	45336	48/10312	0.00186311	0.0167372	0.00938582	AR/PDGFA	2
DOID:10534	stomach cancer	45396	416/10312	0.00189289	0.0167372	0.00938582	MET/AR/MAPK14/EPHA2	4
DOID:229	female reproductive system disease	45396	421/10312	0.00197805	0.0170417	0.00955657	CSF1/AR/MDK/PDGFA	4
DOID:0060085	organ system benign neoplasm	45396	426/10312	0.00206586	0.0173532	0.00973129	CSF1/MET/AR/PDGFA	4
DOID:3008	invasive ductal carcinoma	45336	52/10312	0.00218336	0.0178929	0.0100339	MET/AR	2
DOID:0080005	bone remodeling disease	45365	201/10312	0.0022661	0.0179597	0.0100714	CSF1/AR/MAPK14	3
DOID:5517	stomach carcinoma	45365	202/10312	0.00229841	0.0179597	0.0100714	MET/MAPK14/EPHA2	3
DOID:1115	sarcoma	45365	205/10312	0.00239708	0.0182148	0.0102145	MET/MAPK14/MDK	3
DOID:3458	breast adenocarcinoma	45336	55/10312	0.00243949	0.0182148	0.0102145	CSF1/MAPK14	2
DOID:332	amyotrophic lateral sclerosis	45365	220/10312	0.00293013	0.0210423	0.0118	MET/AR/MAPK14	3
DOID:9743	diabetic neuropathy	45336	61/10312	0.00299229	0.0210423	0.0118	MAPK14/HHIP	2
DOID:4450	renal cell carcinoma	45396	472/10312	0.00300604	0.0210423	0.0118	MET/AR/PDGFA/EPHA2	4
DOID:1575	rheumatic disease	45365	238/10312	0.00366025	0.0241146	0.0135229	CSF1/MET/MAPK14	3
DOID:418	systemic scleroderma	45365	238/10312	0.00366025	0.0241146	0.0135229	CSF1/MET/MAPK14	3
DOID:419	scleroderma	45365	238/10312	0.00366025	0.0241146	0.0135229	CSF1/MET/MAPK14	3
DOID:5041	esophageal cancer	45365	255/10312	0.00444453	0.0287185	0.0161047	MET/AR/MDK	3
DOID:3587	pancreatic ductal carcinoma	45336	76/10312	0.00460626	0.029202	0.0163758	MET/HHIP	2
DOID:3247	rhabdomyosarcoma	45336	81/10312	0.00521635	0.0324573	0.0182013	MET/SPRY1	2
DOID:231	motor neuron disease	45365	274/10312	0.00543463	0.0332006	0.0186181	MET/AR/MAPK14	3
DOID:3007	breast ductal carcinoma	45336	86/10312	0.00586174	0.0345534	0.0193768	MET/AR	2
DOID:4043	skeletal muscle cancer	45336	86/10312	0.00586174	0.0345534	0.0193768	MET/SPRY1	2
DOID:3083	chronic obstructive pulmonary disease	45365	304/10312	0.00725297	0.0406815	0.0228132	MET/MAPK14/HHIP	3
DOID:0060119	pharynx cancer	45336	96/10312	0.00725673	0.0406815	0.0228132	MET/MAPK14	2
DOID:2320	obstructive lung disease	45365	305/10312	0.00731912	0.0406815	0.0228132	MET/MAPK14/HHIP	3
DOID:10952	nephritis	45365	306/10312	0.00738563	0.0406815	0.0228132	SPRY2/CSF1/MET	3
DOID:10591	pre-eclampsia	45365	309/10312	0.00758736	0.0411186	0.0230583	CSF1/AR/MAPK14	3
DOID:2355	anemia	45365	319/10312	0.00828362	0.043489	0.0243876	CD55/SLC19A2/MDK	3
DOID:4905	pancreatic carcinoma	45365	319/10312	0.00828362	0.043489	0.0243876	MET/EPHA2/HHIP	3
DOID:3021	acute kidney failure	45336	110/10312	0.00943752	0.0487847	0.0273574	MET/AR	2
DOID:2154	nephroblastoma	45336	113/10312	0.00993864	0.0505967	0.0283735	MET/AR	2
DOID:657	adenoma	45365	344/10312	0.0101875	0.0510897	0.0286499	MET/AR/PDGFA	3
DOID:4766	embryoma	45365	352/10312	0.0108469	0.0534482	0.0299725	MET/AR/MDK	3
DOID:3717	gastric adenocarcinoma	45336	119/10312	0.010976	0.0534482	0.0299725	MAPK14/EPHA2	2
DOID:127	leiomyoma	45336	120/10312	0.0111534	0.0535361	0.0300218	AR/PDGFA	2
DOID:3498	pancreatic ductal adenocarcinoma	45336	122/10312	0.011512	0.0544793	0.0305507	MET/EPHA2	2
DOID:688	embryonal cancer	45365	378/10312	0.0131614	0.0604783	0.0339149	MET/AR/MDK	3
DOID:2696	Leydig cell tumor	45305	10/10312	0.0134996	0.0604783	0.0339149	PDGFA	1
DOID:4418	cutaneous fibrous histiocytoma	45305	10/10312	0.0134996	0.0604783	0.0339149	AR	1
DOID:718	autoimmune hemolytic anemia	45305	10/10312	0.0134996	0.0604783	0.0339149	CD55	1
DOID:11476	osteoporosis	45336	136/10312	0.0141636	0.0608642	0.0341313	AR/MAPK14	2
DOID:0080011	bone resorption disease	45336	137/10312	0.0143623	0.0608642	0.0341313	AR/MAPK14	2
DOID:0060122	integumentary system cancer	45336	139/10312	0.0147635	0.0608642	0.0341313	MET/MAPK14	2
DOID:4159	skin cancer	45336	139/10312	0.0147635	0.0608642	0.0341313	MET/MAPK14	2
DOID:591	phobic disorder	45305	11/10312	0.0148402	0.0608642	0.0341313	AR	1
DOID:14228	oligospermia	45305	12/10312	0.0161792	0.0608642	0.0341313	AR	1
DOID:1426	ureteral disease	45305	12/10312	0.0161792	0.0608642	0.0341313	CSF1	1
DOID:4305	bone giant cell tumor	45305	12/10312	0.0161792	0.0608642	0.0341313	MET	1
DOID:4465	papillary renal cell carcinoma	45305	12/10312	0.0161792	0.0608642	0.0341313	MET	1
DOID:6536	plasma cell neoplasm	45305	12/10312	0.0161792	0.0608642	0.0341313	MET	1
DOID:8557	oropharynx cancer	45305	12/10312	0.0161792	0.0608642	0.0341313	MET	1
DOID:8712	neurofibromatosis	45305	12/10312	0.0161792	0.0608642	0.0341313	MDK	1
DOID:9164	achalasia	45305	12/10312	0.0161792	0.0608642	0.0341313	SPRY2	1
DOID:9620	vesicoureteral reflux	45305	12/10312	0.0161792	0.0608642	0.0341313	CSF1	1
DOID:824	periodontitis	45336	147/10312	0.0164164	0.0608642	0.0341313	CSF1/MET	2
DOID:2349	arteriosclerosis	45365	411/10312	0.0164841	0.0608642	0.0341313	CSF1/MET/AR	3
DOID:5295	intestinal disease	45365	417/10312	0.0171352	0.0625808	0.0350938	SPRY2/CD55/MAPK14	3
DOID:1496	echinococcosis	45305	13/10312	0.0175164	0.063285	0.0354888	MAPK14	1
DOID:11294	arteriovenous malformation	45305	14/10312	0.0188519	0.0666763	0.0373906	PDGFA	1
DOID:582	hemoglobinuria	45305	14/10312	0.0188519	0.0666763	0.0373906	CD55	1
DOID:2994	germ cell cancer	45365	439/10312	0.019648	0.0687679	0.0385634	MET/AR/MDK	3
DOID:2394	ovarian cancer	45365	441/10312	0.0198862	0.0688841	0.0386286	MET/MAPK14/TACSTD2	3
DOID:5688	Werner syndrome	45305	15/10312	0.0201858	0.0692085	0.0388105	MAPK14	1
DOID:3388	periodontal disease	45336	169/10312	0.021351	0.0715845	0.040143	CSF1/MET	2
DOID:4977	lymphedema	45305	16/10312	0.021518	0.0715845	0.040143	MET	1
DOID:5408	Paget's disease of bone	45305	16/10312	0.021518	0.0715845	0.040143	CSF1	1
DOID:13949	interstitial cystitis	45305	18/10312	0.0241773	0.0796428	0.0446618	CSF1	1
DOID:0060084	cell type benign neoplasm	45365	480/10312	0.024861	0.0810999	0.0454789	MET/AR/PDGFA	3
DOID:4989	pancreatitis	45336	185/10312	0.0252839	0.0816141	0.0457673	MET/PDGFA	2
DOID:11119	Gilles de la Tourette syndrome	45305	19/10312	0.0255044	0.0816141	0.0457673	MET	1
DOID:4362	cervical cancer	45336	187/10312	0.0257952	0.0817658	0.0458524	CD55/MET	2
DOID:0050902	medulloblastoma	45305	20/10312	0.0268299	0.0834707	0.0468084	MET	1
DOID:2769	tic disorder	45305	20/10312	0.0268299	0.0834707	0.0468084	MET	1
DOID:26	pancreas disease	45336	196/10312	0.0281486	0.0859966	0.0482249	MET/PDGFA	2
DOID:1921	Klinefelter syndrome	45305	21/10312	0.0281537	0.0859966	0.0482249	AR	1
DOID:3702	cervical adenocarcinoma	45305	22/10312	0.0294758	0.0876953	0.0491775	MET	1
DOID:4706	infratentorial cancer	45305	22/10312	0.0294758	0.0876953	0.0491775	MET	1
DOID:4074	pancreatic adenocarcinoma	45336	201/10312	0.0294928	0.0876953	0.0491775	MET/EPHA2	2
