# Supplementary material for: Machine learning-based diagnostic model of lymphatics-associated genes for new therapeutic target analysis in intervertebral disc degeneration
Source: Front Immunol. 2024 Dec 4;15:1441028. doi: 10.3389/fimmu.2024.1441028 (PMC11652530; doi:10.3389/fimmu.2024.1441028)
Supplement: Supplementary file 4 [file Table4.xlsx]

## Sheet: Sheet1
Number	Target Gene	DGidb Drug	Interaction Type	Sources	PMIDs	Interaction Score
1	MET	TEPOTINIB	inhibitor	DTC	25736998/32469185/24061647	4.12
2	MET	TIVANTINIB	inhibitor	TALC	None found	3.53
3	MET	ONARTUZUMAB	antagonist	TALC	24101053/27918764/22389872/23882082	3.24
4	MET	SAVOLITINIB	inhibitor	JAX-CKB	28644771/31315834/27694386/25779944/28396313	2.94
5	MET	CAPMATINIB	inhibitor	TALC	28783719/27694386/25971938/28765324/15494073/32877583/28396313	2.36
6	MET	EMIBETUZUMAB	inhibitor	JAX-CKB	27803065/25231402	2.36
7	MET	BMS-777607	inhibitor	MyCancerGenome	22286523/20515943/28396313	2.06
8	MET	CRIZOTINIB	inhibitor	TALC	26729443/12460923/27595477/27343442/21716144/27694386	1.83
9	MET	TELISOTUZUMAB VEDOTIN	n/a	JAX-CKB	27573171	1.77
10	MET	TELISOTUZUMAB	inhibitor	JAX-CKB	None found	1.77
11	MET	TYROSOL SINAPATE	n/a	DTC	23403296	1.18
12	MET	SAR-125844	inhibitor	JAX-CKB	25504634	1.18
13	MET	JNJ-38877605	inhibitor	ChemblInteractions	None found	1.18
14	MET	PF-04217903	inhibitor	TALC	None found	1.18
15	MET	(-)-OLEOCANTHAL	n/a	DTC	23403296	1.18
16	MET	AMG-208	inhibitor	ChemblInteractions	26155941	1.18
17	MET	EMD-1204831	inhibitor	ChemblInteractions	None found	1.18
18	MET	MACROCARPAL A	n/a	DTC	22934600	1.18
19	MET	GALLOCATECHIN GALLATE	n/a	DTC	19839593	1.18
20	MET	MACROCARPAL B	n/a	DTC	22934600	1.18
21	MET	EUCALYPTIN A	n/a	DTC	22934600	1.18
22	MET	TAS-115	inhibitor	JAX-CKB	24140932	0.88
23	MET	CHEMBL261641	n/a	DTC	17595299/23403296	0.88
24	MET	OSIMERTINIB	n/a	JAX-CKB	27694386/29386539/27393507/27252416	0.82
25	MET	GOLVATINIB	inhibitor	JAX-CKB	19832844	0.79
26	MET	CABOZANTINIB	antagonist	TALC	27694386/26432786/21606412/25971939/28192597/29061793/21926191/28396313	0.72
27	MET	PHA-665752	inhibitor	DTC	18077425/24165158/21266357/23542356	0.71
28	MET	FICLATUZUMAB	n/a	JAX-CKB	24901237	0.59
29	MET	SGX-523	inhibitor	ChemblInteractions	None found	0.59
30	MET	AMG-337	inhibitor	ChemblInteractions	None found	0.59
31	MET	MERESTINIB	inhibitor	ChemblInteractions	None found	0.59
32	MET	GLESATINIB	inhibitor	TALC	27694386/28765324/15494073	0.59
33	MET	BMS-698769	inhibitor	ChemblInteractions	None found	0.59
34	MET	APRATOXIN F	n/a	DTC	None found	0.59
35	MET	JNJ-61186372	inhibitor	JAX-CKB	27216193	0.59
36	MET	COMETRIQ	inhibitor	CancerCommons	None found	0.59
37	MET	MK-8033	inhibitor	ChemblInteractions	None found	0.59
38	MET	NAQUOTINIB	n/a	CIViC	29386539	0.59
39	MET	AMUVATINIB	inhibitor	TALC	24326130	0.5
40	MET	FORETINIB	inhibitor	TALC	23213094/26779812	0.49
41	MET	ALTIRATINIB	inhibitor	JAX-CKB	26285778/26965451/24362531	0.44
42	MET	BMS-817378	inhibitor	ChemblInteractions	None found	0.29
43	MET	BMS-794833	inhibitor	ChemblInteractions	None found	0.29
44	MET	CABOZANTINIB S-MALATE	inhibitor	ChemblInteractions	None found	0.29
45	MET	SITRAVATINIB	inhibitor	TTD	None found	0.29
46	MET	CMX-2043	n/a	TTD	None found	0.29
47	MET	LY-3164530	n/a	TTD	None found	0.29
48	MET	ALVESPIMYCIN	n/a	JAX-CKB	26483207	0.29
49	MET	BPI-9016	inhibitor	ChemblInteractions	None found	0.29
50	MET	EPICATECHIN GALLATE	n/a	DTC	19839593	0.29
51	CSF1	EMACTUZUMAB	n/a	TTD	None found	30.91
52	CSF1	PEXIDARTINIB	n/a	CIViC	26222558	10.3
